# Supplementary material
Source: PubMed Central journal article supplement (PMC4512195)
Supplement: supp_mcv092_aob-15200-s03.pdf [file supp_mcv092_aob-15200-s03.pdf]

## SUPPLEMENTARY DATA

### S3. Supplementary table and figures giving details of model comparison, correlation between coefficients and model validation.

Table S1. Model comparison for the sub-model of spatial heterogeneity for the case when MIZ = 8.0 m and effect of obstacle is not considered. The underlined sub-models No. 2 and No. 10, which share the same structure of modelling the potential of tree root provision ( $p$ ), were ultimately selected as sub-models, respectively. Only combination cases that gave a meaningful fit are listed.

| No.       | Structure of the sub-model of spatial heterogeneity |       |                                                 |                      |                    |                    | Fit    |                      |        |                |        |
|-----------|-----------------------------------------------------|-------|-------------------------------------------------|----------------------|--------------------|--------------------|--------|----------------------|--------|----------------|--------|
|           | Production efficiency ( $E$ , Eq. 1)                |       | Potential of tree root provision ( $p$ , Eq. 2) |                      |                    |                    | Nsc/Nc | Evaluation indicator |        |                |        |
|           | Type of function                                    | Ref.  | $\beta$                                         | <i>Broadleaves</i>   | $\lambda_s$        | $\varphi_s$        |        | AIC                  | BIC    | R <sup>2</sup> | RMSE   |
| 1         | Power                                               | Eq.8  | = 0                                             | <i>with P. abies</i> | $\in [0, +\infty]$ | = $\lambda_s$      | 4 / 4  | 375.35               | 381.44 | 0.43           | 360.67 |
| <u>2</u>  | Power                                               | Eq.8  | = 0                                             | <i>with A. alba</i>  | $\in [0, +\infty]$ | = $\lambda_s$      | 4 / 4  | 375.07               | 381.16 | 0.44           | 358.66 |
| 3         | Power                                               | Eq.8  | = 0                                             | <i>with A. alba</i>  | $\in [0, +\infty]$ | = 1                | 3 / 4  | 375.64               | 381.74 | 0.43           | 362.82 |
| 4         | Power                                               | Eq.8  | = 0                                             | <i>with A. alba</i>  | = 1                | $\in [0, +\infty]$ | 4 / 4  | 375.30               | 381.39 | 0.44           | 360.33 |
| 5         | Power                                               | Eq.8  | $\in [0, +\infty]$                              | <i>with A. alba</i>  | = 1                | $\in [0, +\infty]$ | 2 / 5  | 375.20               | 382.52 | 0.48           | 345.55 |
| 6         | Power                                               | Eq.8  | $\in [0, +\infty]$                              | <i>with A. alba</i>  | $\in [0, +\infty]$ | = $\lambda_s$      | 2 / 5  | 376.29               | 383.60 | 0.46           | 353.15 |
| 7         | Power                                               | Eq.8  | = 1                                             | <i>with A. alba</i>  | $\in [0, +\infty]$ | = $\lambda_s$      | 3 / 4  | 374.38               | 380.48 | 0.46           | 353.79 |
| 8         | Power                                               | Eq.8  | = 1                                             | <i>with A. alba</i>  | $\in [0, +\infty]$ | = 1                | 3 / 4  | 374.85               | 380.94 | 0.45           | 357.10 |
| 9         | Logistic                                            | Eq. 4 | = 0                                             | <i>with P. abies</i> | $\in [0, +\infty]$ | = $\lambda_s$      | 4 / 4  | 383.95               | 390.04 | 0.20           | 428.38 |
| <u>10</u> | Logistic                                            | Eq. 4 | = 0                                             | <i>with A. alba</i>  | $\in [0, +\infty]$ | = $\lambda_s$      | 4 / 4  | 383.95               | 390.05 | 0.20           | 428.42 |
| 11        | Logistic                                            | Eq. 4 | = 0                                             | <i>with A. alba</i>  | $\in [0, +\infty]$ | = 1                | 3 / 4  | 383.87               | 389.96 | 0.20           | 427.71 |
| 12        | Logistic                                            | Eq. 4 | = 0                                             | <i>with A. alba</i>  | = 1                | $\in [0, +\infty]$ | 3 / 4  | 383.23               | 389.32 | 0.22           | 422.26 |
| 13        | Logistic                                            | Eq. 4 | $\in [0, +\infty]$                              | <i>with A. alba</i>  | = 1                | $\in [0, +\infty]$ | 2 / 5  | 385.22               | 392.54 | 0.22           | 422.21 |
| 14        | Logistic                                            | Eq. 4 | $\in [0, +\infty]$                              | <i>with A. alba</i>  | $\in [0, +\infty]$ | = $\lambda_s$      | 3 / 5  | 385.95               | 393.27 | 0.20           | 428.42 |
| 15        | Logistic                                            | Eq. 4 | = 1                                             | <i>with A. alba</i>  | $\in [0, +\infty]$ | = $\lambda_s$      | 3 / 4  | 385.86               | 391.95 | 0.14           | 445.06 |
| 16        | Logistic                                            | Eq. 4 | = 1                                             | <i>with A. alba</i>  | $\in [0, +\infty]$ | = 1                | 3 / 4  | 385.46               | 391.55 | 0.15           | 441.53 |

Note:  $N_{sc} / N_c$  – Number of significant coefficient / number of total coefficient. See the table of Table Abbreviations and symbols for the meaning of the others.

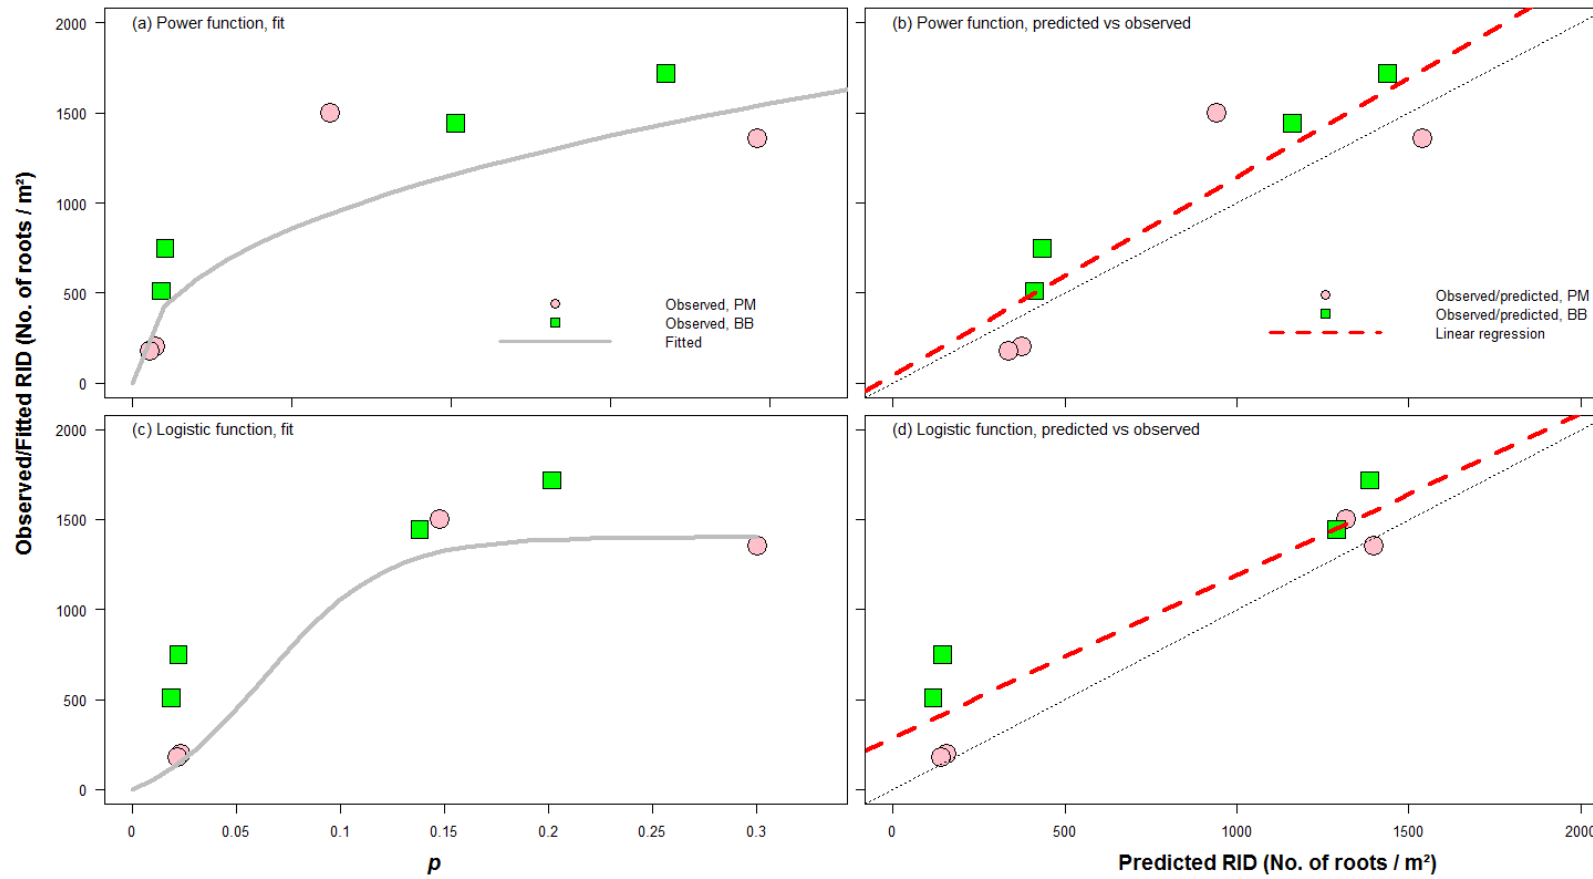

Figure S1. Validation of the ultimately selected sub-models of spatial heterogeneity using not-fitted root data. In (b) and (d), smooth spline is replaced by linear regression due to low number of points.  $p$  – potential of tree root provision. Note that the metric  $p$  differs according to the modelling approaches because of the parameter values of  $\lambda_s$  and  $\alpha$  (see [Table 2](#)).

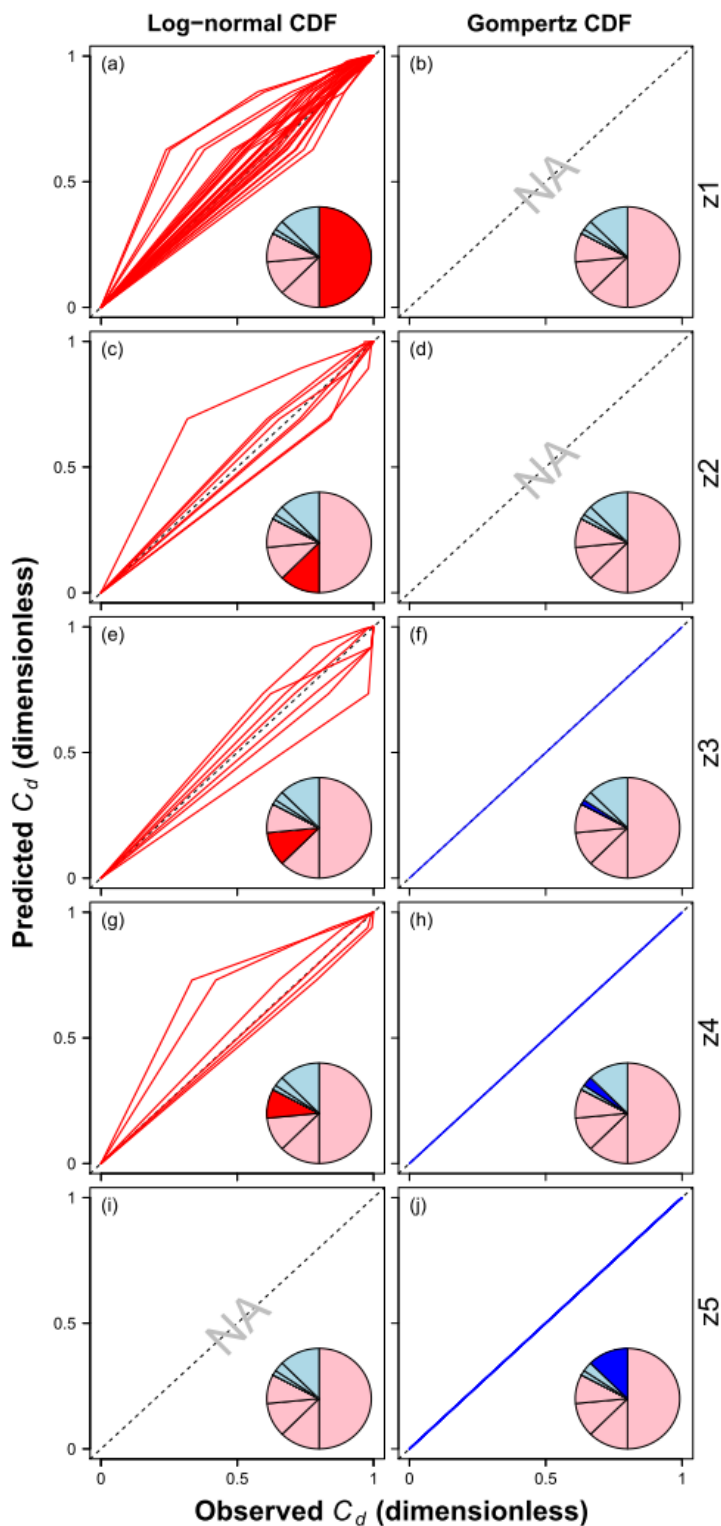

Figure S2. Validation of the ultimately selected sub-models of diameter spectrum using not-fitted root data. Rows of plots:  $z1$  to  $z5$  denote the five soil layers from  $]0.0, 0.2]$  m to  $]0.8, 1.0]$  m; columns of plots: left for log-normal CDF and right for Gompertz CDF. In each plot, the pie chart (right on the bottom) shows the proportion of cases in the database for model validation of all the soil layers. Colours: pink -  $C_d$  at 1 mm < 0.990 (it turns to red when the case is referred to in the plot using log-normal CDF); light blue -  $C_d$  at 1 mm  $\geq$  0.990 (it turns to deep blue when the case is referred to in the plot using Gompertz CDF). For example, the pie chart in (a) shows that up to 50% cases of diameter spectrum at the soil depth of  $]0.0, 0.2]$  m amongst all the cases of diameter spectrum should be modelled by log-normal CDF. NAs in (b), (d), (i) denote that no available data fall in these cases.

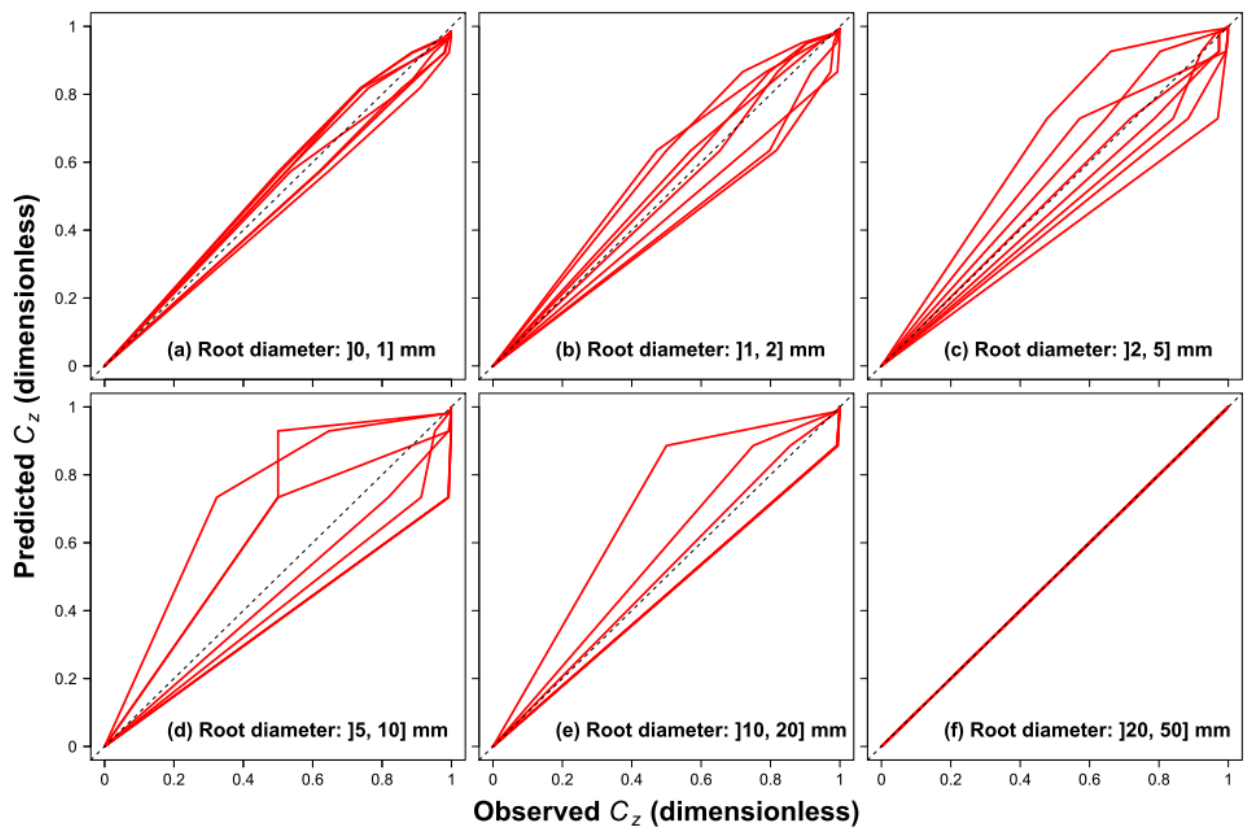

Figure S3 Validation of the sub-model of vertical profile using non-fitted field observed data. Each red curves denote one root vertical profile

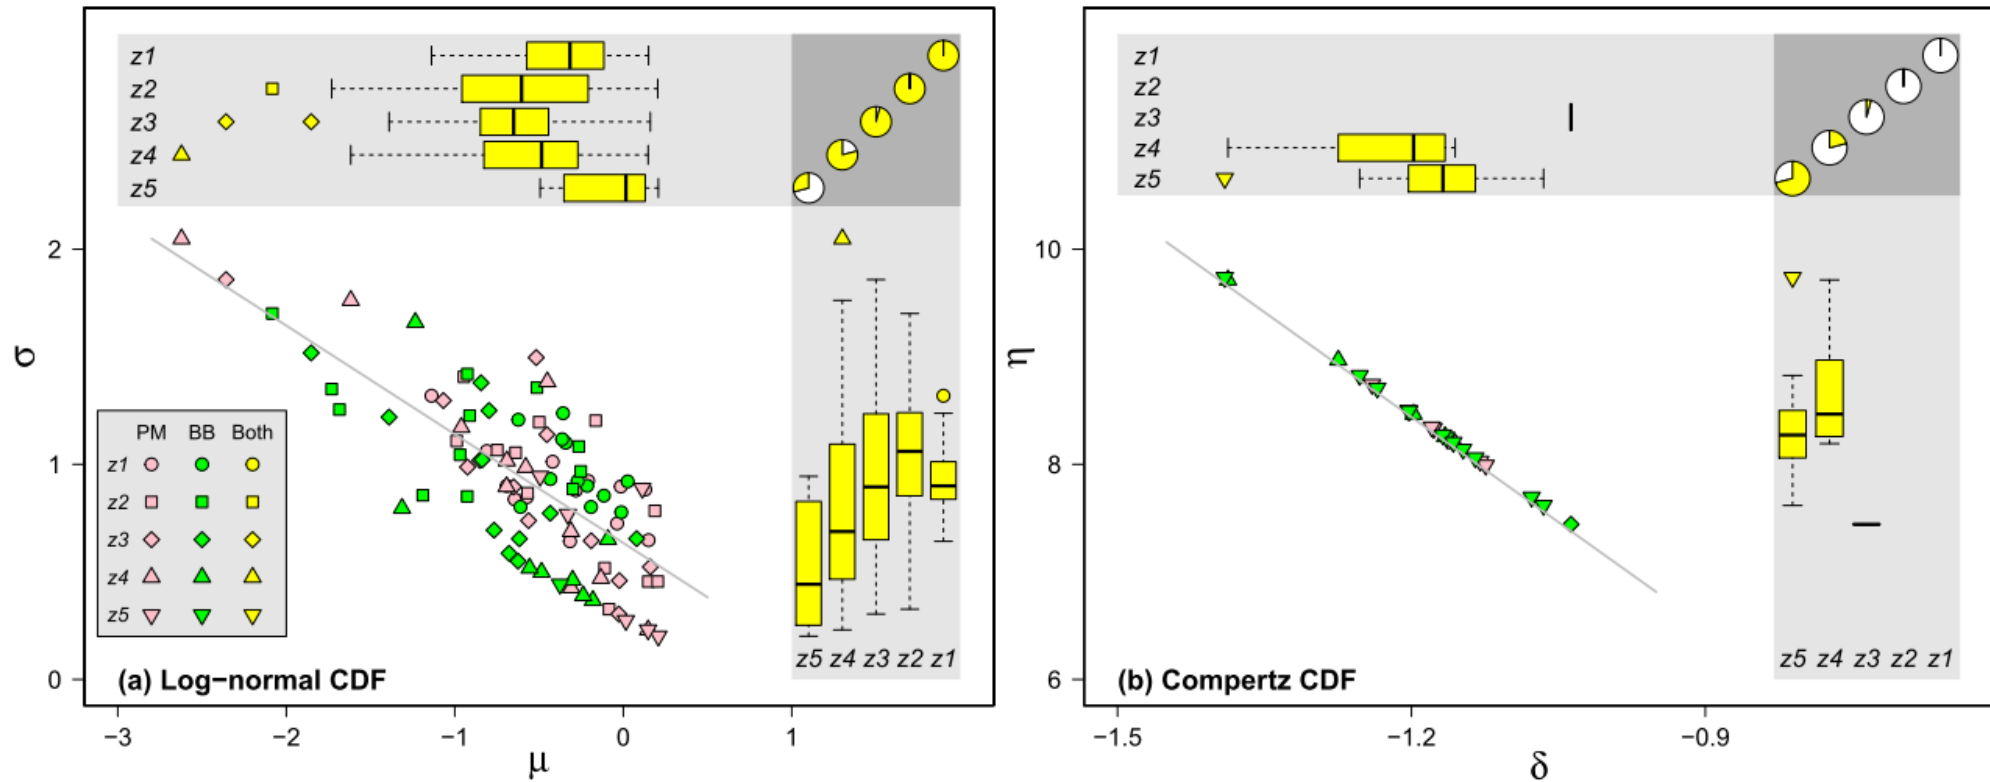

Figure S4. Variation of the parameters of the Log-normal CDF (a, used when  $C_d$  at a root diameter of 1 mm  $< 0.990$ ) and Gompertz CDF (b, used when  $C_d$  at 1 mm  $\geq 0.990$ ) for the sub-model of diameter spectrum. In each of pie charts (right on the top) in (a), yellow and white colours denote  $C_d$  at 1 mm was  $< 0.990$  and  $\geq 0.990$ , respectively; this is converse in (b).  $z1$  to  $z5$  denote the five soil layers from  $[0.0, 0.2]$  m to  $[0.8, 1.0]$  m. Grey lines represent linear regressions; the equation in (a):  $\sigma = -0.50\mu + 0.63$  ( $R^2 = 0.56$ ); the equation in (b):  $\eta = -6.50\delta + 0.68$  ( $R^2 = 0.99$ ).
